# Supplementary material for: Distinct medial amygdala oxytocin receptor neurons projections respectively control consolation or aggression in male mandarin voles
Source: PubMed Central journal article supplement — Nat Commun. 2024 Sep 17;15:8139. doi: 10.1038/s41467-024-51652-8 (PMC11408735; doi:10.1038/s41467-024-51652-8), 2024-09-17
Supplement: 41467_2024_51652_MOESM3_ESM.pdf [file 41467_2024_51652_MOESM3_ESM.pdf]

## Description of Additional Supplementary Files

File Name: Supplementary Data 1

Description: Statistical analysis

File Name: Supplementary Movie 1

Description: Optogenetic activation of the MeA OXTR somata projecting to the AI increased consolation.

File Name: Supplementary Movie 2

Description: Optogenetic activation of the fibers at the AI from the MeA OXTR neurons increased consolation.

File Name: Supplementary Movie 3

Description: Optogenetic activation of the MeA OXTR somata projecting to the VMHvl aggression.

File Name: Supplementary Movie 4

Description: Optogenetic activation of the fibers at the VMHvl from the MeA OXTR neurons increased aggression.

File Name: Supplementary Movie 5

Description: Optogenetic activation of the fibers at the AI from the glutamatergic (VGlut2) MeA OXTR neurons increased consolation.

File Name: Supplementary Movie 6

Description: Optogenetic activation of the fibers at the VMHvl from the glutamatergic (VGlut2) MeA OXTR neurons increased aggression.
